# Supplementary material for: New perspectives on the laser initiation for metal tetrazine complexes: a theoretical study
Source: Royal Society of Chemistry journal article supplement (doi:10.1039/d1cp02319e), 2021-11-23
Supplement: d1cp02319e1.pdf [file d1cp02319e1.pdf]

# Supporting Information

## New perspective on the laser initiation for metal tetrazine complexes: a theoretical study

Junqing Yang<sup>a,b,\*</sup>, Gu-Dan Zhang<sup>b</sup>, Jian-Guo Zhang<sup>b,\*</sup>, Dong Chen<sup>c</sup>, Qi Zhang<sup>c</sup>

<sup>a</sup> School of Mechanical Engineering, Nanjing University of Science and Technology, Nanjing, 210094, China

<sup>b</sup> State Key Laboratory of Explosion Science and Technology, Beijing Institute of Technology, Beijing, 100081, China

<sup>c</sup> Institute of Chemical Materials, China Academy of Engineering Physics, Mianyang, Sichuan, 621900, China

### Table of content:

|                                                                                                                                 |    |
|---------------------------------------------------------------------------------------------------------------------------------|----|
| <b>The mathematical forms for the parameters <math>Sr</math>, <math>D</math>, and <math>t</math>:</b> .....                     | S2 |
| <b>Table S1.</b> Excitation descriptors ( $Sr$ , $D$ , $Sr/D$ , and $t$ ) and the statistical charge transfer data. ....        | S3 |
| <b>Figure S1.</b> UV-vis spectra of $\text{NO}_3^-$ (solid line) and non- $\text{NO}_3^-$ (dotted line) bounded complexes. .... | S4 |
| <b>Figure S2.</b> Charge density difference (CDD) plots of complexes <b>11B-13B</b> and <b>7B</b> . ....                        | S5 |

---

\* Corresponding author. Jian-Guo Zhang: [zjgbit@bit.edu.cn](mailto:zjgbit@bit.edu.cn)  
Junqing Yang: [yjq881223@163.com](mailto:yjq881223@163.com)

**The mathematical forms for the parameters  $Sr$ ,  $D$ , and  $t$ :**

1.  $Sr$  index is defined as Eq(1):

$$S_r = \int S_r(r) dr \equiv \int \sqrt{\rho^{\text{hole}}(r)\rho^{\text{ele}}(r)} dr \quad (1)$$

Where the  $\rho^{\text{hole}}(r)$  and  $\rho^{\text{ele}}(r)$  denote the density distribution of hole and electron.

2.  $D$  index is defined as Eq(2):

$$D = |D| \equiv \sqrt{(X_{\text{ele}} - X_{\text{hole}})^2 + (Y_{\text{ele}} - Y_{\text{hole}})^2 + (Z_{\text{ele}} - Z_{\text{hole}})^2} \quad (2)$$

Taking X coordinate of centroid of electron ( $X_{\text{ele}}$ ) as an example,  $X_{\text{ele}}$  is written as:

$$X_{\text{ele}} = \int x \rho^{\text{ele}}(r) dr$$

Where  $x$  is X component of position vector  $r$ .

3.  $t$  index is to measure separation of hole and electron in CT direction, which is defined as Eq(3):

$$t = D - H_{\text{CT}} \quad (3)$$

$H_{\text{CT}}$  is written as:

$$H_{\text{CT}} = |H \cdot \mu_{\text{CT}}|$$

$$H = (|\sigma_{\text{ele}}| + |\sigma_{\text{hole}}|) / 2$$

Where  $\mu_{\text{CT}}$  is unit vector in CT direction;  $|\sigma_{\text{ele}}|$  and  $|\sigma_{\text{hole}}|$  are refer to as  $\sigma_{\text{hole}}$  and  $\sigma_{\text{ele}}$  indices, they measure overall RMSD of hole and electron, respectively.

**Table S1.** Excitation descriptors ( $Sr$ ,  $D$ ,  $Sr/D$ , and  $t$ ) and the statistical charge transfer data.

| Complexes  | $Sr$ | $D$ (Å) | $Sr/D$ | $t$   | M→L   | L→M   | L→L   | MC    | LC    |
|------------|------|---------|--------|-------|-------|-------|-------|-------|-------|
| <b>1A</b>  | 0.28 | 2.80    | 0.10   | 1.77  | 0.003 | 0.070 | 0.617 |       | 0.310 |
| <b>2A</b>  | 0.49 | 2.53    | 0.19   | 1.17  | 0.049 | 0.405 | 0.334 | 0.039 | 0.172 |
| <b>3A</b>  | 0.28 | 2.75    | 0.10   | 1.79  |       | 0.001 | 0.665 |       | 0.333 |
| <b>4A</b>  | 0.30 | 3.67    | 0.08   | 2.65  | 0.002 | 0.023 | 0.079 |       | 0.947 |
| <b>5A</b>  | 0.43 | 2.23    | 0.19   | 0.05  | 0.012 | 0.014 | 0.650 |       | 0.324 |
| <b>6A</b>  | 0.26 | 3.70    | 0.07   | 2.60  |       | 0.008 | 0.010 |       | 0.982 |
| <b>1B</b>  | 0.29 | 2.91    | 0.10   | 1.87  | 0.003 | 0.066 | 0.615 |       | 0.314 |
| <b>2B</b>  | 0.36 | 3.60    | 0.10   | 2.06  | 0.013 | 0.210 | 0.152 | 0.004 | 0.618 |
| <b>3B</b>  | 0.30 | 2.86    | 0.10   | 1.88  |       | 0.002 | 0.655 |       | 0.343 |
| <b>4B</b>  | 0.31 | 3.64    | 0.08   | 2.60  | 0.001 | 0.025 | 0.029 |       | 0.944 |
| <b>5B</b>  | 0.29 | 3.18    | 0.09   | 1.55  |       | 0.012 | 0.671 |       | 0.316 |
| <b>6B</b>  | 0.31 | 3.59    | 0.09   | 2.50  | 0.001 | 0.018 | 0.059 |       | 0.922 |
| <b>7B</b>  | 0.34 | 0.05    | 6.80   | -3.28 | 0.013 | 0.004 | 0.861 |       | 0.119 |
| <b>8B</b>  | 0.30 | 3.14    | 0.10   | 1.82  | 0.022 | 0.001 | 0.073 |       | 0.898 |
| <b>9B</b>  | 0.55 | 1.90    | 0.29   | 0.42  | 0.550 | 0.026 | 0.233 | 0.039 | 0.152 |
| <b>10B</b> | 0.52 | 0.70    | 0.74   | -1.24 | 0.294 | 0.038 | 0.325 | 0.017 | 0.326 |

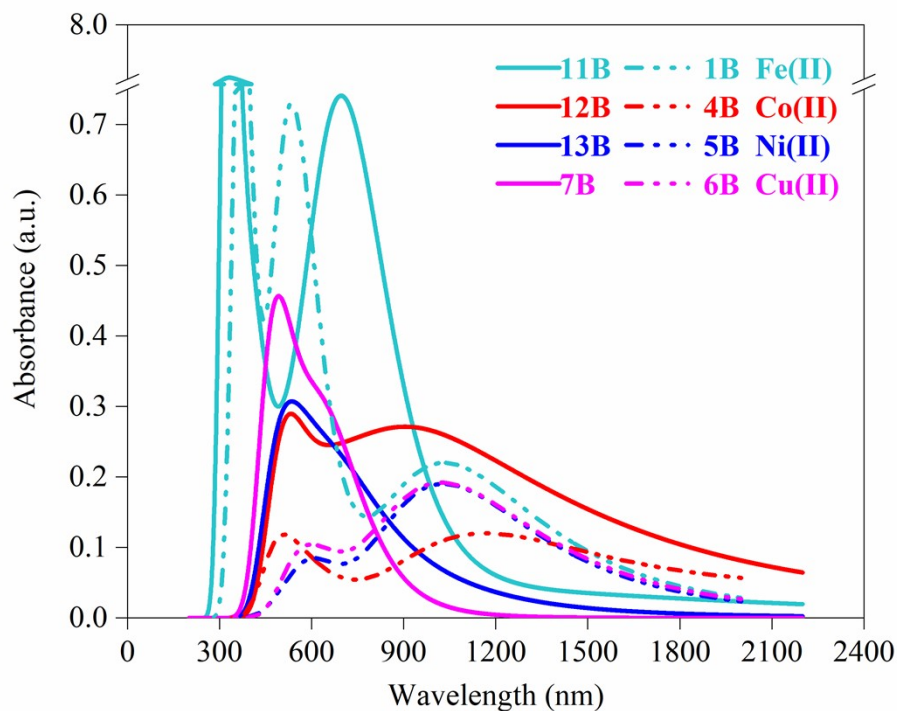

**Figure S1.** UV-vis spectra of  $\text{NO}_3^-$  (solid line) and non- $\text{NO}_3^-$  (dotted line) bounded complexes.

**Figure S1** shows the UV-vis absorption spectra of  $\text{NO}_3^-$  bounded complexes (**11B**, **12B**, **13B**, **7B**) with solid lines. For comparison, their non- $\text{NO}_3^-$  bounded analogues (**1B**, **4B**, **5B**, **6B**) are also presented with dotted lines. There are several spectral differences between these two series. In the  $\text{NO}_3^-$  bounded complexes, the peak location of the low-energy CT band varies between 696 nm in **11B**, 904 nm in **12B**, 535 nm in **13B**, and 493 nm in **7B**. In the non- $\text{NO}_3^-$  bounded complexes, it varies between 1031 nm in **1B**, 1166 nm in **4B**, 1029 nm in **5B** and 1021 nm in **6B**. Obviously, the CT band is blue-shifted in the  $\text{NO}_3^-$  bounded complexes relative to that of the non- $\text{NO}_3^-$  analogues, while the absorption magnitude of the low energy CT band peaks is found to be larger in the former, which can be likely attributed to the effect of the  $\text{NO}_3^-$  on the electronegativity and electronic structure. Besides, in non- $\text{NO}_3^-$  bounded analogues, Fe(II) complex (**1B**) possesses the strongest absorption intensity at 1064nm. However, in  $\text{NO}_3^-$  bounded complexes, Co(II) complex (**12B**) possesses the strongest absorption intensity at 1064nm. The anomalous behavior of **12B** may be attributed to the distributions of  $\text{NO}_3^-$  groups: in the same side for **12B**, while in the opposite sides for **7B**, **11B**, and **13B**.

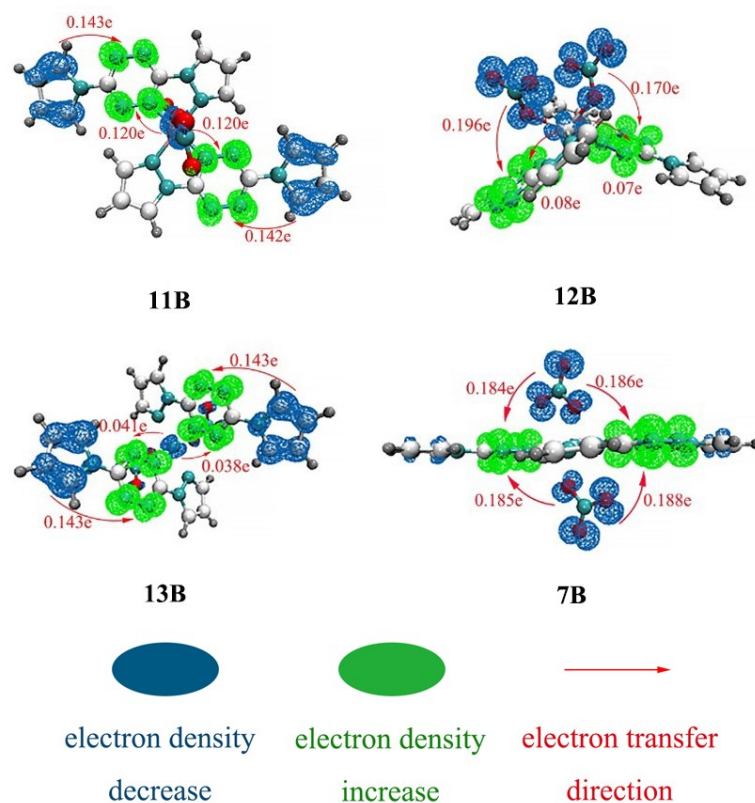

**Figure S2.** Charge density difference (CDD) plots of complexes **11B-13B** and **7B**.

**Figure S2** shows the CDD plots of complexes **7B** and **11B-13B**. In comparison with the non- $\text{NO}_3^-$  bounded divalent metal complexes, all the  $\text{NO}_3^-$  bounded complexes have relative obvious MLCT character, as TMD plots presented in the main manuscript. The electron transfers from metal to ligand are 0.013e (**7B**), 0.248e (**11B**), 0.158e (**12B**), and 0.081e (**13B**), respectively. The specific charge transfers in all transition modes of **7B** and **11B-13B** are in follows:

**7B:** MLCT 0.013, LMCT 0.004, LLCT 0.861, LC 0.119

**11B:** MLCT 0.248, LMCT 0.003, LLCT 0.409, MC 0.001, LC 0.332

**12B:** MLCT 0.158, LMCT 0.040, LLCT 0.760, MC 0.008, LC 0.034

**13B:** MLCT 0.081, LMCT 0.028, LLCT 0.506, MC 0.002, LC 0.379
